# Supplementary material for: 3D composites of layered MoS2 and graphene nanoribbons for high performance lithium-ion battery anodes
Source: Royal Society of Chemistry journal article supplement (doi:10.1039/c6ta04331c), 2016-01-01
Supplement: c6ta04331c1.pdf [file c6ta04331c1.pdf]

## Supplementary Information

3D layered MoS<sub>2</sub> / interconnected graphene nanoribbons networks for  
high performance lithium ion battery anode

Ran Tian, Weiqiang Wang, Yaolin Huang, Huanan Duan\*, Yiping Guo, Hongmei Kang,  
Hua Li, Hezhou Liu\*

State Key Laboratory of Metal Matrix Composites, School of Materials Science and Engineering,  
Shanghai Jiao Tong University, Shanghai 200240, P.R. China

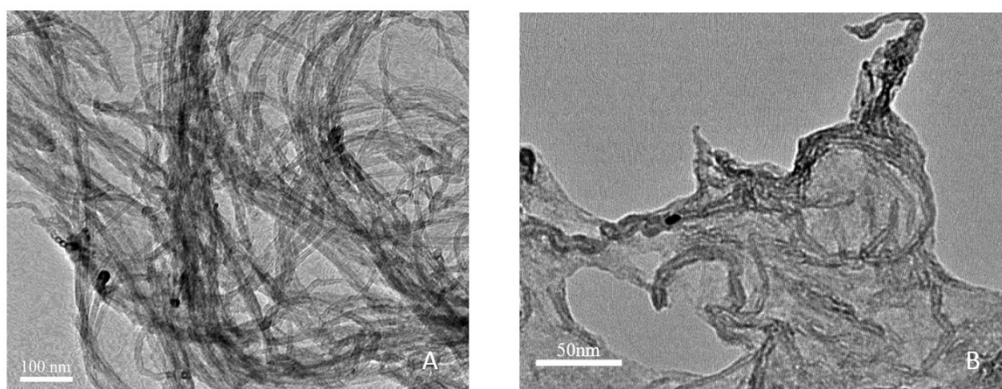

**Figure S1** TEM images of (A) MWCNTsand (B) GONRs.

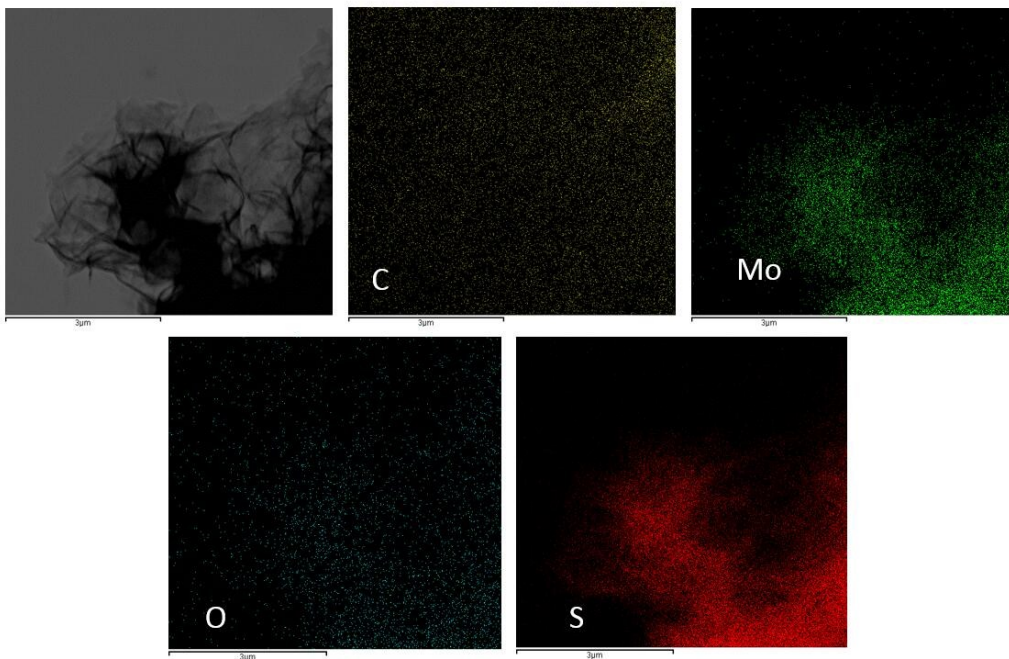

**Figure S2** TEM EDS mapping images of MSG.

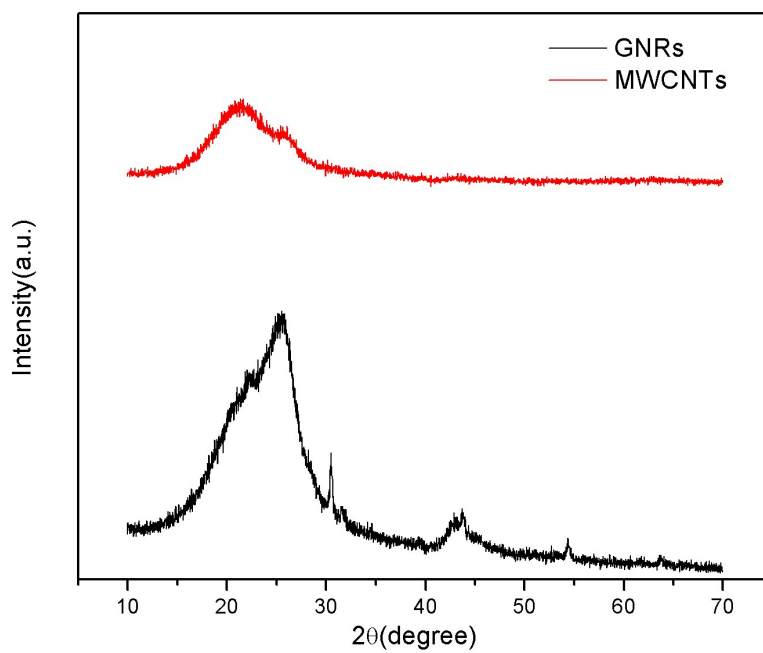

**Figure S3** The XRD patterns of GNRs and MWCNTs.

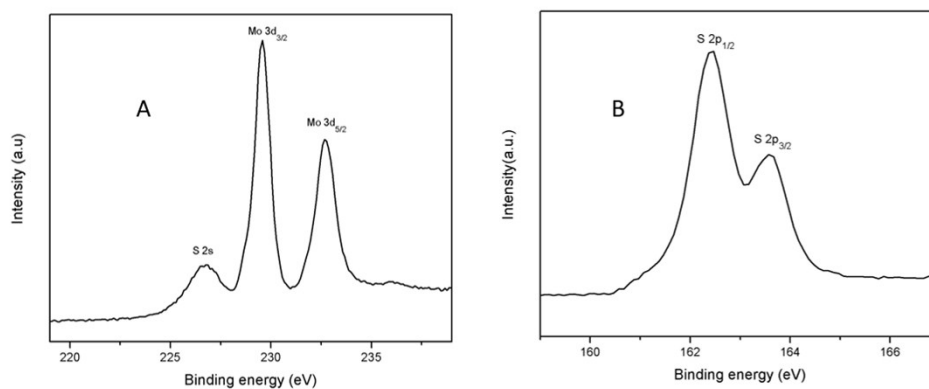

**Figure S4** XPS spectra of MSG in (A) Mo 3d and (B) S 2p.

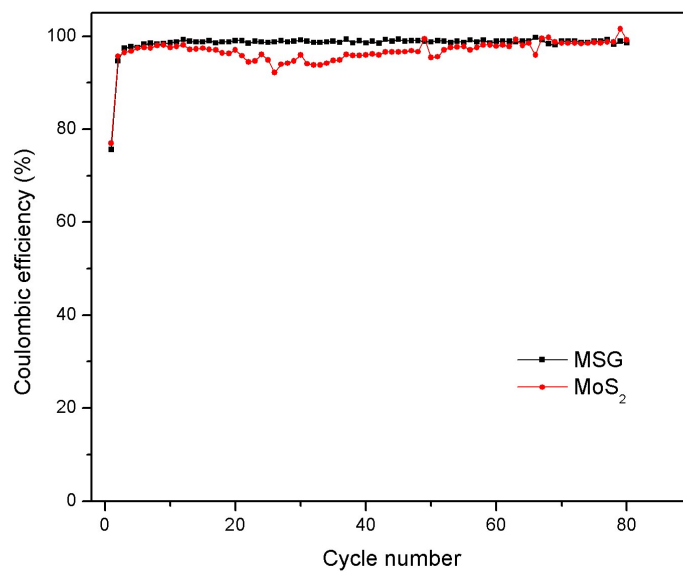

**Figure S5** Coulombic efficiency of MSG and MoS<sub>2</sub>

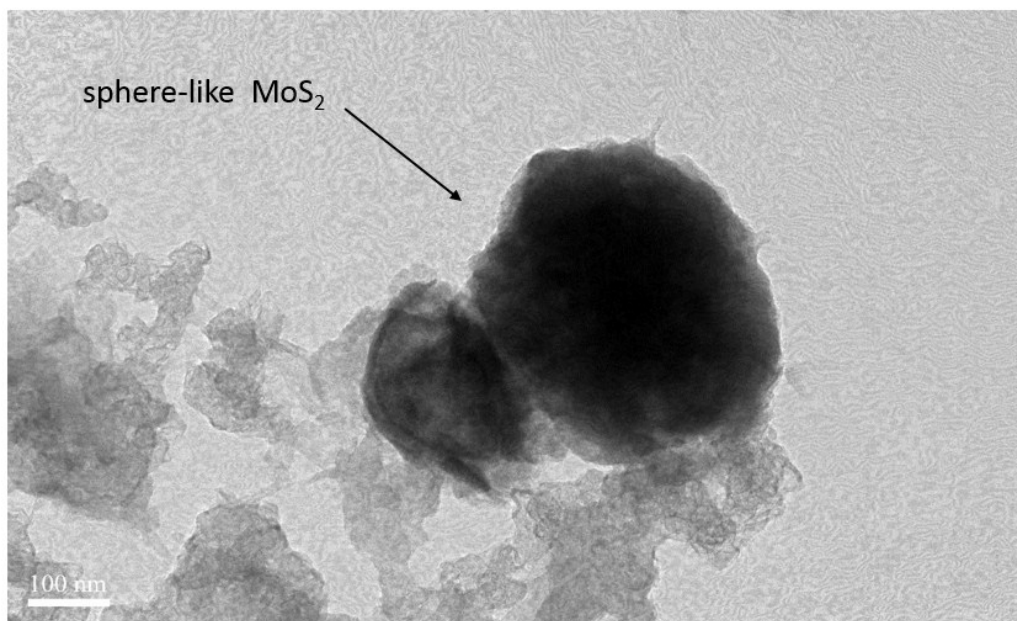

**Figure S6** TEM images of MSG electrode after 20 cycles.

**Table S1.** Comparison of MoS<sub>2</sub> based anode materials

| Active material                                                   | Charging rate<br>(mA g <sup>-1</sup> ) | Capacity<br>retention<br>(Capacity in mA<br>h g <sup>-1</sup> / Cycle No.) | Highest rate capacity in<br>mA h g <sup>-1</sup> / corresponding<br>current density in A g <sup>-1</sup> |
|-------------------------------------------------------------------|----------------------------------------|----------------------------------------------------------------------------|----------------------------------------------------------------------------------------------------------|
| Present work                                                      | 200                                    | 1009.4 / 80                                                                | 606.8 / 3                                                                                                |
| C <sub>3</sub> N <sub>4</sub> /NRGO/MoS <sub>2</sub> <sup>1</sup> | 100                                    | 855 / 100                                                                  | 130 / 8                                                                                                  |
| MoS <sub>2</sub> <sup>2</sup>                                     | 100                                    | ~900 / 50                                                                  | 554 / 53.1                                                                                               |
| MoS <sub>2</sub> /PNAI<br>Nanowires <sup>3</sup>                  | 100                                    | 952.6 / 50                                                                 | 320 / 1                                                                                                  |
| MoS <sub>2</sub> -r-GO-PEO <sup>4</sup>                           | 100                                    | 890 / 100                                                                  | 545 / 2                                                                                                  |
| HC@MoS <sub>2</sub> <sup>5</sup>                                  | 250                                    | 970 / 100                                                                  | 560 / 4                                                                                                  |
| CNT@MoS <sub>2</sub> <sup>6</sup>                                 | 100                                    | 698 / 60                                                                   | 369 / 1                                                                                                  |
| MoS <sub>2</sub> /a-C<br>composites <sup>7</sup>                  | 100                                    | 912 / 100                                                                  | 961 / 0.1                                                                                                |

1. Y. Hou, J. Li, Z. Wen, S. Cui, C. Yuan and J. Chen, *Nano Energy*, 2014, **8**, 157-164.
2. H. Hwang, H. Kim and J. Cho, *Nano Letters*, 2011, **11**, 4826-4830.
3. L. Yang, S. Wang, J. Mao, J. Deng, Q. Gao, Y. Tang and O. G. Schmidt, *Advanced Materials*, 2013, **25**, 1180-1184.
4. Y.-T. Liu, X.-D. Zhu, Z.-Q. Duan and X.-M. Xie, *Chemical Communications*, 2013, **49**, 10305-10307.
5. Y. Xia, B. Wang, X. Zhao, G. Wang and H. Wang, *Electrochimica Acta*, 2015, **187**, 55-64.
6. S. Ding, J. S. Chen and X. W. Lou, *Chemistry-a European Journal*, 2011, **17**, 13142-13145.
7. K. Chang, W. Chen, L. Ma, H. Li, H. Li, F. Huang, Z. Xu, Q. Zhang and J.-Y. Lee, *Journal of Materials Chemistry*, 2011, **21**, 6251.
